# Supplementary material for: Effects of age and cognitive function on data quality of standardized surveys in nursing home populations
Source: PubMed Central journal article supplement (PMC6724313; doi:10.1186/s12877-019-1258-0), 2019-09-03
Supplement: 12877_2019_1258_MOESM1_ESM.pdf [file 12877_2019_1258_MOESM1_ESM.pdf]

**Table S1:** Comparisons of sample characteristics classified by null-hypothesis families

| <b>Characteristics: Comparison of distributions</b>                                                                 |                                                 |                                                               |                                                 |                                                              |
|---------------------------------------------------------------------------------------------------------------------|-------------------------------------------------|---------------------------------------------------------------|-------------------------------------------------|--------------------------------------------------------------|
| <b>Null-hypothesis family I (k=8, <math>\alpha_{corr}</math>=0.00625): MMSE-groups within evaluation</b>            |                                                 |                                                               |                                                 |                                                              |
|                                                                                                                     |                                                 | <i>Pre</i>                                                    |                                                 | <i>Post</i>                                                  |
| Female                                                                                                              | $\chi^2 \approx 0.001$                          | $p \approx 0.977$ (n=285)                                     | $\chi^2 \approx 0.346$                          | $p \approx 0.556$ (n=372)                                    |
| Age <sup>a</sup>                                                                                                    | $t \approx -1.213$<br>(df=282)                  | $p \approx 0.226$ (n=284)<br>CI <sub>95%</sub> [-3.56, 0.84]  | $t \approx -0.153$<br>(df=371)                  | $p \approx 0.879$ (n=373)<br>CI <sub>95%</sub> [-1.89, 1.62] |
| Duration of Stay <sup>a</sup>                                                                                       | $t \approx -1.216$<br>(df <sub>corr</sub> =74)  | $p \approx 0.228$ (n=271)<br>CI <sub>95%</sub> [-2.51, 0.61]  | $t \approx 0.919$<br>(df=367)                   | $p \approx 0.358$ (n=369)<br>CI <sub>95%</sub> [-0.54, 1.48] |
| Duration of Interview <sup>b</sup>                                                                                  | $t \approx 0.044$<br>(df=273)                   | $p \approx 0.965$ (n=275)<br>CI <sub>95%</sub> [-0:08, 0:08]  | $t \approx -2.856$<br>(df <sub>corr</sub> =270) | $p \approx 0.005$ (n=365)<br>CI <sub>95%</sub> [0:03, 0:20]  |
| <b>Null-hypothesis family II (k=8, <math>\alpha_{corr}</math>=0.00625): Pre- and post-test within MMSE-groups</b>   |                                                 |                                                               |                                                 |                                                              |
|                                                                                                                     |                                                 | <i>MMSE 18-30</i>                                             |                                                 | <i>MMSE 10-17</i>                                            |
| Female                                                                                                              | $\chi^2 \approx 2.068$                          | $p \approx 0.150$ (n=517)                                     | $\chi^2 \approx 0.115$                          | $p \approx 0.734$ (n=140)                                    |
| Age (years)                                                                                                         | $t \approx -2.674$<br>(df <sub>corr</sub> =447) | $p \approx 0.008$ (n=517)<br>CI <sub>95%</sub> [-3.09, -0.47] | $t \approx -0.451$<br>(df=138)                  | $p \approx 0.653$ (n=140)<br>CI <sub>95%</sub> [-3.02, 1.89] |
| Duration of Stay (years)                                                                                            | $t \approx 0.562$<br>(df=501)                   | $p \approx 0.574$ (n=503)<br>CI <sub>95%</sub> [-0.53, 0.96]  | $t \approx 2.052$<br>(df <sub>corr</sub> =78)   | $p \approx 0.043$ (n=137)<br>CI <sub>95%</sub> [0.05, 3.22]  |
| Duration of Interview (min.)                                                                                        | $t \approx -2.300$<br>(df <sub>corr</sub> =415) | $p \approx 0.022$ (n=506)<br>CI <sub>95%</sub> [-0:14, -0:01] | $t \approx 0.630$<br>(df=132)                   | $p \approx 0.530$ (n=134)<br>CI <sub>95%</sub> [-0:07, 0:15] |
| <b>Null-hypothesis family III (k=4, <math>\alpha_{corr}</math>=0.0125): Pre- and post-test within entire sample</b> |                                                 |                                                               |                                                 |                                                              |
| Female                                                                                                              | $\chi^2 \approx 2.043$                          | $p \approx 0.153$ (n=657)                                     |                                                 |                                                              |
| Age (years)                                                                                                         | $t \approx -2.586$<br>(df <sub>corr</sub> =578) | $p \approx 0.010$ (n=657)<br>CI <sub>95%</sub> [-2.67, -0.37] |                                                 |                                                              |
| Duration of Stay (years)                                                                                            | $t \approx 1.539$<br>(df=638)                   | $p \approx 0.124$ (n=640)<br>CI <sub>95%</sub> [-0.14, 1.18]  |                                                 |                                                              |
| Duration of Interview (minutes)                                                                                     | $t \approx -1.825$<br>(df <sub>corr</sub> =602) | $p \approx 0.068$ (n=640)<br>CI <sub>95%</sub> [-0:11, 0:01]  |                                                 |                                                              |

Notes: MMSE Mini-Mental State Examination; <sup>a</sup> Years; <sup>b</sup> Minutes; k Number of inferential tests; n Sample sizes; df Degrees of freedom; CI<sub>95%</sub> 95% Confidence interval;  $\chi^2$  Pearson Chi<sup>2</sup>; t Student's t
