# Supplementary material for: Effects of age and cognitive function on data quality of standardized surveys in nursing home populations
Source: PubMed Central journal article supplement (PMC6724313; doi:10.1186/s12877-019-1258-0), 2019-09-03
Supplement: 12877_2019_1258_MOESM2_ESM.pdf [file 12877_2019_1258_MOESM2_ESM.pdf]

**Table S2:** Characteristics of item nonresponse distribution

| <b>Descriptive statistics for item nonresponse rate</b> |          |              |                      |               |            |                           |                       |                       |                        |
|---------------------------------------------------------|----------|--------------|----------------------|---------------|------------|---------------------------|-----------------------|-----------------------|------------------------|
| INR – univariate measures and proportions               |          |              |                      |               |            |                           |                       |                       |                        |
|                                                         | <b>n</b> | <b>Range</b> | <b>Mean<br/>(SD)</b> | <b>Median</b> | <b>IQR</b> | <b>Sk, Ku</b>             | <b>&gt;0%<br/>INR</b> | <b>&gt;5%<br/>INR</b> | <b>&gt;10%<br/>INR</b> |
| Pre                                                     | 286      | 0-70.4%      | 6.05%<br>(9.5)       | 3.84%         | 0-8.7%     | 3.5,<br>17.2 <sup>a</sup> | 57.7%<br>(f=165)      | 33.8%<br>(f=97)       | 18.7%<br>(f=53)        |
| Post                                                    | 373      | 0-91.3%      | 5.40%<br>(8.6)       | 3.86%         | 0-8.0%     | 4.5,<br>32.8 <sup>a</sup> | 56.3%<br>(f=210)      | 31.0%<br>(f=116)      | 15.6%<br>(f=58)        |
| Total                                                   | 659      | 0-91.3%      | 5.68%<br>(8.9)       | 3.85%         | 0-8.3%     | 3.9,<br>24.6 <sup>a</sup> | 56.9%<br>(f=375)      | 32.2%<br>(f=213)      | 16.9%<br>(f=111)       |

Notes: INR Item nonresponse, SD Standard deviation, IQR Interquartile range, Sk Skewness, Ku Kurtosis, f Frequency; <sup>a</sup> Right-skewed, leptokurtic distribution
