# Supplementary material for: Effects of age and cognitive function on data quality of standardized surveys in nursing home populations
Source: PubMed Central journal article supplement (PMC6724313; doi:10.1186/s12877-019-1258-0), 2019-09-03
Supplement: 12877_2019_1258_MOESM4_ESM.pdf [file 12877_2019_1258_MOESM4_ESM.pdf]

**I. Sensitivity analyses: Question/Survey familiarity ('habituation') effect in NHR who participated both in pre- and posttest**

*I. a. Adjusted comparisons of item nonresponse rates (ANCOVA)*

| Sample                | Cognitive impairment    | Mean (SE, n <sub>valid</sub> ) | Mean diff. (SE) [95% CI] | $\eta^2$ (F), p      |
|-----------------------|-------------------------|--------------------------------|--------------------------|----------------------|
| Post                  | No or mild (MMSE 18-30) | 3.93% (0.5, n=289)             | 7.31% (1.1) [5.22, 9.40] | 11.7% (47.5) p<0.001 |
|                       | Moderate (MMSE 10-17)   | 11.24% (0.9, n=75)             |                          |                      |
| Post <sup>SENS</sup>  | No or mild (MMSE 18-30) | 3.93% (0.5, n=289)             | 7.30% (1.1) [5.20, 9.39] | 11.6% (47.0) p<0.001 |
|                       | Moderate (MMSE 10-17)   | 11.23% (0.9, n=75)             |                          |                      |
| Total                 | No or mild (MMSE 18-30) | 3.98% (0.4, n=502)             | 7.67% (0.8) [6.10, 9.24] | 12.9% (92.4) p<0.001 |
|                       | Moderate (MMSE 10-17)   | 11.85% (0.7, n=134)            |                          |                      |
| Total <sup>SENS</sup> | No or mild (MMSE 18-30) | 3.98% (0.4, n=502)             | 7.68% (0.8) [6.11, 9.24] | 12.9% (92.3) p<0.001 |
|                       | Moderate (MMSE 10-17)   | 11.65% (0.7, n=134)            |                          |                      |

Notes: SENS=further dummy control included (dependent sample: 'no', 'yes')

*I. b. Regression models (enter-model, response: INR)*

**BLR – Binary logistic regression statistics<sup>a</sup> (factor: MMSE 10-17 vs. 18-30, n=655)**

| Response                 | B (SE) | Wald | OR [CI 95%]      | p       |
|--------------------------|--------|------|------------------|---------|
| >0% INR                  | 1.02   | 22.4 | 2.78 [1.82-4.25] | p<0.001 |
| >0% INR <sup>SENS</sup>  | 1.03   | 22.5 | 2.79 [1.83-4.27] | p<0.001 |
| >5% INR                  | 1.34   | 45.2 | 3.83 [2.58-5.66] | p<0.001 |
| >5% INR <sup>SENS</sup>  | 1.36   | 45.6 | 3.88 [2.62-5.74] | p<0.001 |
| >10% INR                 | 1.46   | 42.6 | 4.31 [2.78-6.68] | p<0.001 |
| >10% INR <sup>SENS</sup> | 1.47   | 42.6 | 4.31 [2.78-6.68] | p<0.001 |

**MLR – Multiple linear regression statistics<sup>a</sup>** (*stepwise-model, response: INR, n=637*)

| Factor                         | B (SE)         | $\beta$                                        | t              | p       |
|--------------------------------|----------------|------------------------------------------------|----------------|---------|
| Duration                       | 0.00 (0.00)    | 0.04                                           | 1.22           | p≈0.233 |
| Duration <sup>SENS</sup>       | 0.00 (0.00)    | 0.04                                           | 1.18           | p≈0.237 |
| Age                            | 0.14 (0.04)    | 0.12                                           | 3.22           | p≈0.001 |
| Age <sup>SENS</sup>            | 0.14 (0.05)    | 0.11                                           | 3.01           | p≈0.003 |
| MMSE                           | -0.65 (0.06)   | -0.39                                          | -10.82         | p<0.001 |
| MMSE <sup>SENS</sup>           | -0.65 (0.06)   | -0.39                                          | -10.68         | p<0.001 |
| Gender                         | -0.92 (0.78)   | -0.04                                          | -1.17          | p≈0.242 |
| Gender <sup>SENS</sup>         | -0.88 (0.79)   | -0.04                                          | -1.12          | p≈0.261 |
| Sample                         | -0.77 (0.66)   | -0.02                                          | -0.60          | p≈0.244 |
| Sample <sup>SENS</sup>         | -0.81 (0.66)   | -0.05                                          | -1.22          | p≈0.222 |
| R <sup>2</sup> <sub>corr</sub> | 16.5%          | R <sup>2</sup> <sub>corr</sub> <sup>SENS</sup> | 16.5%          |         |
| F, p                           | 32.79, p<0.001 | F, p <sup>SENS</sup>                           | 21.92, p<0.001 |         |

Notes: SENS=further dummy control included (dependent sample: ‘no’, ‘yes’)

***I. c. t-tests (i.e. mean differences in INR between repeated measure ‘no’ (independent sample) / ‘yes’ (dependent sample))***

| Sample                       | Repeated measure<br>(no/yes) | Mean<br>(SE, n <sub>valid</sub> ) | Mean diff. (SE)<br>[95% CI]  | p     |
|------------------------------|------------------------------|-----------------------------------|------------------------------|-------|
| Total                        | Independent                  | 5.79%<br>(0.4, n=450)             | 0.33% (0.8)<br>[-1.16, 1.82] | 0.663 |
|                              | Dependent (repeated)         | 5.45%<br>(0.6, n=205)             |                              |       |
| Posttest                     | Independent                  | 5.57%<br>(0.5, n=268)             | 0.64% (0.9)<br>[-1.33, 2.60] | 0.525 |
|                              | Dependent (repeated)         | 4.94%<br>(0.8, n=103)             |                              |       |
| MMSE<br>no/mild,<br>Posttest | Independent                  | 4.17%<br>(0.4, n=210)             | 0.81% (0.7)<br>[-0.52, 2.13] | 0.232 |
|                              | Dependent (repeated)         | 3.37%<br>(0.5, n=84)              |                              |       |

|           |                                   |             |               |       |
|-----------|-----------------------------------|-------------|---------------|-------|
| MMSE      | Independent                       | 10.67%      | -1.24% (3.9)  | 0.751 |
| moderate, |                                   | (1.9, n=58) | [-9.02, 6.53] |       |
| Posttest  | Dependent (repeated) <sup>#</sup> | 11.91%      |               |       |
|           |                                   | (3.1, n=19) |               |       |

# M-W-U 493.00; z=-0.692; p=0.489

Notes: Comparisons of mean INR between independent and dependent samples

### ***I. d. Repetition of manuscripts' main analyses split by repeated measures ('no'/'yes'), summary***

INR by MMSE-group (ANCOVA)

Independent Mean diff. 7.51%\*\*\* (4.12% vs. 11.62%)

Dependent Mean diff. 8.09%\*\*\* (3.67% vs. 11.77%)

BLR (factor MMSE 10-17 vs. 18-30)

Independent  $OR^{>0\%}=3.26^{***}$ ,  $OR^{>5\%}=4.19^{***}$ ,  $OR^{>10\%}=4.41^{***}$

Dependent  $OR^{>0\%}=2.11^{**}$ ,  $OR^{>5\%}=3.30^{***}$ ,  $OR^{>10\%}=4.10^{***}$

MLR (stepwise, response: INR)

Independent  $\beta^{MMSE}=-0.396^{***}$ ,  $\beta^{Age}=0.136^{**}$

Dependent  $\beta^{MMSE}=-0.364^{***}$ ,  $\beta^{Age}=0.160^{**}$

\*\*\* p<0.001, \*\* p<0.01

Notes: summarized findings, not shown in full detail

## **II. Sensitivity analyses: Cluster sampling – Fixed Effects models eliminating between-cluster variation (NH-dummy adjustment)**

### ***II. a. Adjusted comparisons of item nonresponse rates (ANCOVA)***

|                         |              |              |               |
|-------------------------|--------------|--------------|---------------|
| No or mild (MMSE 18-30) | 4.03%        |              |               |
|                         | (0.4, n=502) | 7.45% (0.8)  | 11.9% (83.33) |
| Moderate (MMSE 10-17)   | 11.48%       | [5.85, 9.06] | p<0.001       |
|                         | (0.7, n=134) |              |               |

Notes: Adjustment of between-cluster variance by including n-1 nursing home dummy variables

### ***II. b. Multiple linear regression (MLR)***

| Factor   | B (SE)      | $\beta$ | t    | p     |
|----------|-------------|---------|------|-------|
| Duration | 0.00 (0.00) | 0.03    | 0.68 | 0.495 |
| Age      | 0.12 (0.05) | 0.10    | 2.48 | 0.013 |

|                     |                |       |        |        |
|---------------------|----------------|-------|--------|--------|
| MMSE                | -0.66 (0.06)   | -0.39 | -10.45 | <0.001 |
| Gender              | -0.59 (0.79)   | -0.03 | -0.75  | 0.456  |
| Sample              | -0.52 (0.66)   | -0.03 | -0.78  | 0.436  |
| $R^2_{\text{corr}}$ | 16.3%          |       |        |        |
| F, p                | 19.96, p<0.001 |       |        |        |

---

Notes: Adjustment of between-cluster variance by including n-1 nursing home dummy variables

### Abbreviations

|          |                                   |
|----------|-----------------------------------|
| NHR      | Nursing Home Residents            |
| ANCOVA   | Analyses of Covariance            |
| SE       | Standard Error                    |
| 95% CI   | 95% Confidence Interval           |
| n        | Sample Size                       |
| F        | F-value (ANCOVA)                  |
| p        | p-value                           |
| $\eta^2$ | Eta-square                        |
| MMSE     | Mini-Mental Status Examination    |
| Post     | Posttest                          |
| SENS     | Sensitivity Analyses              |
| INR      | Item nonresponse rate             |
| BLR      | Binary Logistic Regression        |
| B        | Unstandardized Coefficient        |
| $\beta$  | Beta (Standardized Coefficient    |
| OR       | Odds Ratio                        |
| t        | t-value (t-test)                  |
| $R^2$    | R-square                          |
| corr     | Corrected (MLR)                   |
| MLR      | Multiple Linear Regression        |
| M-W-U    | Mann-Whitney U-Test               |
| z        | z-value                           |
| diff.    | Difference (i.e. Mean Difference) |
