# Supplementary material for: Effects of age and cognitive function on data quality of standardized surveys in nursing home populations
Source: Springer Nature journal article supplement (doi:10.1186/s12877-019-1258-0), 2019-09-03
Supplement: MOESM3 [file 17133058]

Kutschar P., Weichbold M. & Osterbrink J. Effect of Age and Cognitive Impairment on Data Quality of Standardized Surveys in Nursing Home Populations: English Version of the applied Questionnaire

| Question text (Translated from German)                                                                         | Answer Categories / Scale                                                                                                                                                                                        |
|----------------------------------------------------------------------------------------------------------------|------------------------------------------------------------------------------------------------------------------------------------------------------------------------------------------------------------------|
| 1 In which situations do you experience pain?                                                                  | Lying or sitting / Getting up / Walking / Bandage change / Urinating / Bowel movement / Washing or personal hygiene / Eating or swallowing / Others   <i>I don't have pain / don't know / cannot be answered</i> |
| 1a For how long have you been experiencing pain?                                                               | Less than or equal to three months / More than three months / More than six months / More than a year   <i>don't know / cannot be answered</i>                                                                   |
| 1b In what areas do you feel pain? Please indicate the area that hurts the most.                               | Body scheme format (pain drawing)   <i>don't know / cannot be answered</i>                                                                                                                                       |
| 2 Please rate the intensity of your pain while you are resting.                                                | I don't have pain / mild pain / moderate pain / severe pain / unbearable pain   <i>don't know / cannot be answered</i>                                                                                           |
| 3 Please rate the intensity of your pain while you are under stress (e.g. moving, coughing).                   | I don't have pain / mild pain / moderate pain / severe pain / unbearable pain   <i>don't know / cannot be answered</i>                                                                                           |
| 4 During the last three days, were you asked if you were experiencing pain?                                    | Yes / No   <i>don't know / cannot be answered</i>                                                                                                                                                                |
| 5 Do you report to the nursing staff when in pain?                                                             | Yes, every time / Sometimes / no   <i>don't know / cannot be answered</i>                                                                                                                                        |
| 5a Did you receive any treatment for your pain, if you did report to the nursing staff?                        | Yes, every time / Sometimes / no   <i>don't know / cannot be answered</i>                                                                                                                                        |
| 6 Have you received any pain medication in the last three days?                                                | Yes / No   <i>don't know / cannot be answered</i>                                                                                                                                                                |
| 6a How did the pain medication help with your pain?                                                            | Very well / Fair / Very poor   <i>don't know / cannot be answered</i>                                                                                                                                            |
| 7 Did you sleep well in the last three nights?                                                                 | Very well / Fair / Very poor   <i>don't know / cannot be answered</i>                                                                                                                                            |
| 7a If you did not sleep well, was it due to your pain?                                                         | Yes / Some part / No   <i>don't know / cannot be answered</i>                                                                                                                                                    |
| 8a Have you experienced nausea in the last three days?                                                         | Yes / No   <i>don't know / cannot be answered</i>                                                                                                                                                                |
| 8b Have you experienced the urge to vomit in the last three days?                                              | Yes / No   <i>don't know / cannot be answered</i>                                                                                                                                                                |
| 8c Have you experienced dizziness in the last three days?                                                      | Yes / No   <i>don't know / cannot be answered</i>                                                                                                                                                                |
| 8d Have you experienced breathing difficulties in the last three days?                                         | Yes / No   <i>don't know / cannot be answered</i>                                                                                                                                                                |
| 8e Have you experienced constipation in the last three days?                                                   | Yes / No   <i>don't know / cannot be answered</i>                                                                                                                                                                |
| 9 Have you received any pain treatment besides pain medication?                                                | Yes / No   <i>don't know / cannot be answered</i>                                                                                                                                                                |
| 9a If yes, did the nursing staff apply cold packs?                                                             | Yes / No   <i>don't know / cannot be answered</i>                                                                                                                                                                |
| 9b If yes, did the nursing staff apply heat packs?                                                             | Yes / No   <i>don't know / cannot be answered</i>                                                                                                                                                                |
| 9c If yes, did you have a focused conversation about your pain with the nursing staff?                         | Yes / No   <i>don't know / cannot be answered</i>                                                                                                                                                                |
| 9d If yes, did the nursing staff help you get into a pain relieving position?                                  | Yes / No   <i>don't know / cannot be answered</i>                                                                                                                                                                |
| 9e If yes, did the nursing staff show you pain reducing movements?                                             | Yes / No   <i>don't know / cannot be answered</i>                                                                                                                                                                |
| 10 How satisfied are you with the treatment of your pain?                                                      | I don't have pain / very satisfied / satisfied / dissatisfied / very dissatisfied   <i>don't know / cannot be answered</i>                                                                                       |
| 10a Please elaborate.                                                                                          | Open answer format   <i>don't know / cannot be answered</i>                                                                                                                                                      |
| 11a-e EQ-5D-3L Descriptive system (mobility, self-care, usual activities, pain discomfort, anxiety/depression) | The EuroQol Group (1990). EuroQol-a new facility for the measurement of health-related quality of life. Health Policy 16(3):199-208                                                                              |
| 12 EQ Visual analogue scale (self-rated health state)                                                          | Web page: <a href="https://euroqol.org/eq-5d-instruments/eq-5d-3l-about/">https://euroqol.org/eq-5d-instruments/eq-5d-3l-about/</a>                                                                              |
| 13 Compared to my overall health in the last 12 months, my health in the last three days was...                | Better / Same / Worse   <i>don't know / cannot be answered</i>                                                                                                                                                   |
